# Supplementary material for: Codon Usage Bias and Effective Population Sizes on the X Chromosome versus the Autosomes in Drosophila melanogaster
Source: PubMed Central journal article supplement — Mol Biol Evol. 2012 Nov 29;30(4):811–23. doi: 10.1093/molbev/mss222 (PMC3603305; doi:10.1093/molbev/mss222), 2012-11-29
Supplement: supp_mss222_Campos_Supplementary_material-4.pdf [file supp_mss222_Campos_Supplementary_material-4.pdf]

**Supplementary material 4. Estimates of selection and mutation parameters for CUB using a model with potential X-A differences in mutational bias**

| $\theta_X$ | $\kappa_X$ | $\gamma_X$ | $\theta_A$ | $\kappa_A$ | $\gamma_A$ | $g$  | $\tau_X$ | $\ln L$      |
|------------|------------|------------|------------|------------|------------|------|----------|--------------|
| 0.0027     | 4.17       | 1.75       | 0.0043     | 3.23       | 1.33       | 2.66 | 0.0725   | -2365177.880 |

Let  $N_{eX}$  and  $N_{eA}$  be the effective population sizes of X and A before the change in population size, respectively. The scaled parameters are defined as follows:  $\theta_X = 4 \times N_{eX} \times u_X$ ,  $\theta_A = 4 \times N_{eA} \times u_A$ ,  $\gamma_X = 4 \times N_{eX} \times s_X$  and  $\gamma_A = 4 \times N_{eA} \times s_A$ . Mutational biases are modelled by  $\kappa_X$  and  $\kappa_A$ ;  $\kappa > 1$  means that mutation is biased towards unpreferred codons (mostly AT-ending). The extant population size for X or A can be obtained by multiplying  $g$  and  $N_{eX}$  or  $N_{eA}$ , respectively. Let  $t$  be the number of generations since the change in population size. We define  $\tau_X$  as  $t/(2gN_{eX})$ . Similarly,  $\tau_A = t/(2gN_{eA}) = \lambda \times \tau_X$ , where  $\lambda = N_{eX}/N_{eA}$ . Therefore, the model only has one free time parameter. To reduce computational complexity, which increases rapidly with the number of free parameters, the maximum likelihood search was carried out in a restricted case with  $\lambda = 0.75$ , which should be reasonable in light of the results presented in the main text.
